# Supplementary material for: The impact of past HIV interventions and diagnosis gaps on new HIV acquisitions, transmissions, and HIV-related deaths in Côte d’Ivoire, Mali, and Senegal
Source: PubMed Central journal article supplement (PMC11356671; doi:10.1097/qad.0000000000003974), 2024-07-01
Supplement: aids-38-1783-s002.pdf [file aids-38-1783-s002.pdf]

**The impact of past HIV interventions and diagnosis gaps on new HIV acquisitions, transmissions, and HIV-related deaths in Côte d’Ivoire, Mali, and Senegal. Supplementary results.**

**Contents**

*Supplementary Results* ..... **2**

**Impact of condom use and ART uptake on HIV outcomes over time (AFs).** ..... **2**

**HIV infections acquired and transmitted**..... **6**

**HIV diagnosis and treatment gaps, and transmission PAF of PLHIV with undiagnosed infection**..... **14**

*References* ..... **18**

## Supplementary Results

### Impact of condom use and ART uptake on HIV outcomes over time (AFs).

The fractions of new HIV infections and deaths averted by condom use, ART uptake, and both ( $AF_{t_0-t_1}$ ), among all and specific risk groups were estimated by comparing the cumulative number of new HIV acquisitions and deaths over periods  $[t_0 - t_1]$  between the base-case scenario (with current coverages of intervention) and counterfactual scenarios where condoms and/or ART do not protect against acquisition/transmission and/or do not reduce disease progression among the relevant risk groups.

$$AF_{t_0-t_1} = \frac{CI_{t_0-t_1}(\text{without intervention}) - CI_{t_0-t_1}(\text{with intervention})}{CI_{t_0-t_1}(\text{without intervention})}$$

Because separate interventions might avert the same secondary transmission  $AF_{t_0-t_1}$ , estimates for both condom use and ART combined are lower than the sum of the  $AF_{t_0-t_1}$  for condom use and ART separately.

Our results suggest that condom use has averted high fractions of new infections in all modelled countries, with  $AF_{2012-2021}$  estimates up to 74% (63-82%) in Côte d'Ivoire, 75% (66.0-85%) in Mali, and 82% (74-87%) in Senegal (Table 2a, Figure S5a), while consistently averting around a quarter of HIV-related deaths over each decade, with  $AF_{2012-2021}$  of 22% (14-33%) in Côte d'Ivoire, 19% (13-32%) in Mali, and 30% (19-44%) in Senegal (Table 2b, Figure S5b). The estimated increases in the fractions of new HIV infections and deaths averted by ART over time reflected country differences in its progressive scale-up, which was faster in Senegal ( $AF_{2012-2021}$  of 48% (43-54)) for new HIV infections, and 48% (35-55) for HIV-related deaths, with ART coverage increasing from 51% to 67% over the period) and Côte d'Ivoire ( $AF_{t_0-t_1}$  of 42% (39-50) for new HIV infections, and 40% (31-48) for HIV-related deaths, with ART coverage increasing from 39% to 65% over the period) than in Mali (with  $AF_{t_0-t_1}$  of 27% (22-34) of new HIV infections and 29% (21-37) of HIV-related deaths averted, with ART coverage increasing from 27% to 45% over the period). Our model results suggest that condoms and ART may continue averting an increasing proportion of new infections and deaths over the next decade (Figures S5a,b).

We estimated that the impact of condom use on HIV infections and deaths in Mali and Senegal over 2012-2021 was almost entirely due to its use by FSW and clients with all their partners (with >90% of FSW reporting using a condom at last paid sex, and ~80% in our model which assumes over-

reporting), with condom use among non-KP averting negligible proportions of new HIV infections and deaths (reflecting the low (<5% at last sex) reported use of condoms in national household surveys). In Côte d'Ivoire, condom use among non-KP (~16% at last sex[1]) might have averted 14% of new infections and 2% of HIV deaths over the period 2012-2021 (Table 2). In contrast, most of the impact on ART on new HIV infections in Côte d'Ivoire was due to its scale-up among non-KP (40%, vs 11% for the scale-up among KP), whereas ART scale-up among KP averted similar (Senegal) or higher (Mali) fractions of new infections than scale-up among non-KP. The fractions of HIV-related deaths averted by ART uptake by non-KP was always greater than the fractions averted by scale-up among KP.

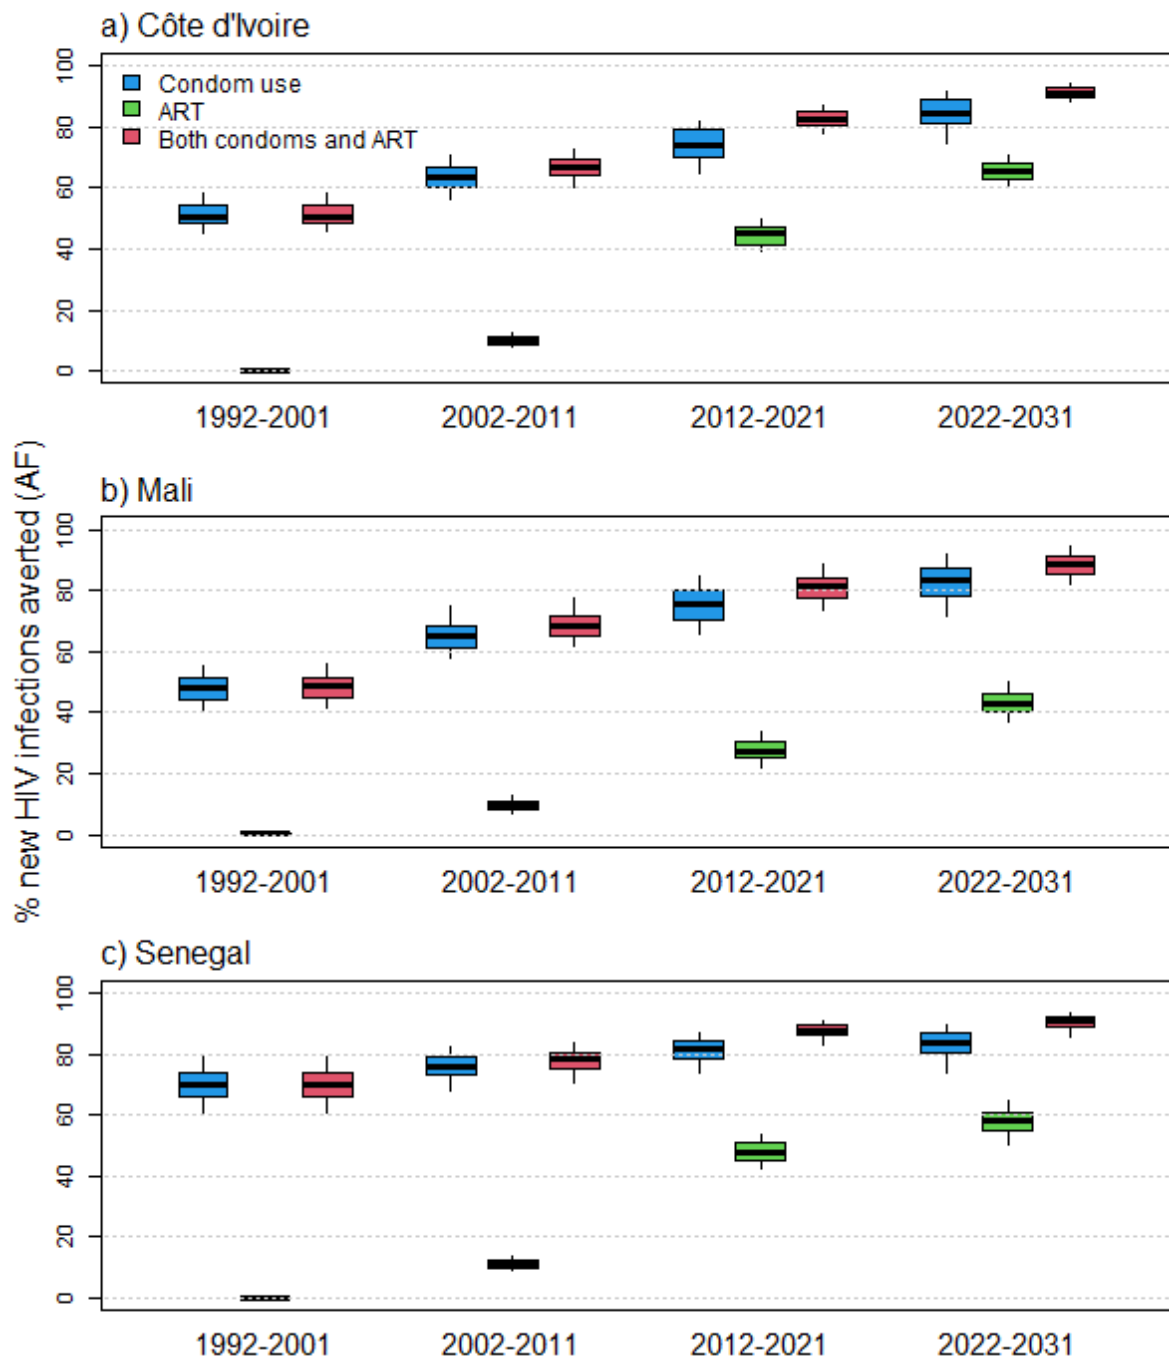

Figure S5a: Fraction of new HIV infections that may have been averted by the use of condoms (blue boxes and intervals), ART (green boxes and intervals), and both (red boxes and intervals) over successive decades (AFs). Boxes represent median and interquartile range, whereas error bars represent 90% uncertainty interval (UI) (5<sup>th</sup> and 95<sup>th</sup> percentiles) of AF estimates across all posterior parameter sets.

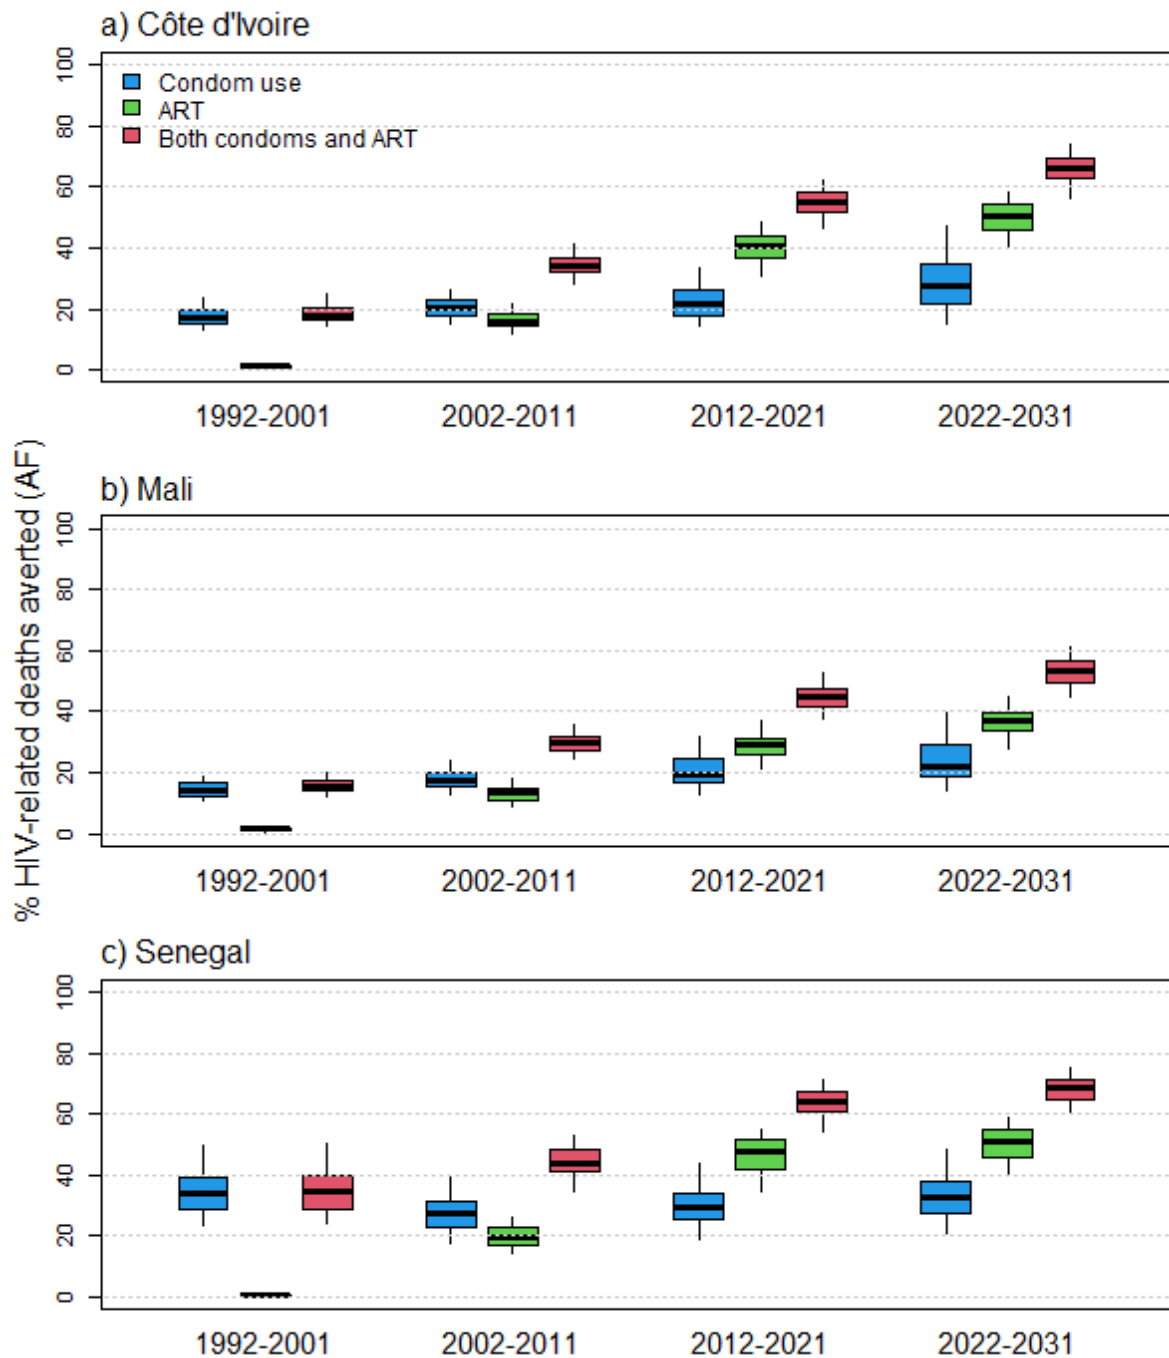

Figure S5b: Fraction of HIV-related deaths that may have been averted by the use of condoms (blue boxes and intervals), ART (green boxes and intervals), and both (red boxes and intervals) over successive decades (AFs). Boxes represent median and interquartile range, whereas error bars represent 90% uncertainty interval (UI) (5<sup>th</sup> and 95<sup>th</sup> percentiles) of AF estimates across all posterior parameter sets.

## HIV infections acquired and transmitted

Table S3. Estimated fractions of all new HIV infections which were acquired, directly transmitted, or directly and indirectly transmitted by specific risk groups (tPAF) over 2012-2021. Median and 90% UI (5<sup>th</sup> and 95<sup>th</sup> percentiles) of indicators are shown.

|                              | Fractions of<br>infections acquired | Fractions of<br>infections directly<br>transmitted | Fractions of<br>infections directly<br>and indirectly<br>transmitted (10-year<br>tPAF) |
|------------------------------|-------------------------------------|----------------------------------------------------|----------------------------------------------------------------------------------------|
| <b>Côte d'Ivoire</b>         |                                     |                                                    |                                                                                        |
| All females                  | 57% (52-63)                         | 40% (35-47)                                        | 65% (61-70)                                                                            |
| All males                    | 43% (37-48)                         | 60% (53-65)                                        | 78% (74-82)                                                                            |
| FSW                          | 3% (1-5)                            | 3% (1-8)                                           | 7% (3-13)                                                                              |
| Clients                      | 8% (5-15)                           | 13% (7-24)                                         | 20% (12-35)                                                                            |
| MSM                          | 2% (1-4)                            | 3% (2-5)                                           | 3% (2-6)                                                                               |
| Key populations <sup>a</sup> | 14% (9-20)                          | 20% (12-32)                                        | 27% (16-40)                                                                            |
| Non-key populations females  | 54% (48-60)                         | 37% (31-43)                                        | 59% (53-66)                                                                            |
| Non-key populations males    | 32% (26-37)                         | 43% (32-51)                                        | 57% (44-67)                                                                            |
| <b>Mali</b>                  |                                     |                                                    |                                                                                        |
| All females                  | 58% (51-65)                         | 38% (32-45)                                        | 61% (56-67)                                                                            |
| All males                    | 42% (35-49)                         | 62% (55-68)                                        | 79% (75-83)                                                                            |
| FSW                          | 8% (5-14)                           | 13% (6-24)                                         | 24% (13-39)                                                                            |
| Clients                      | 17% (10-28) <sup>b</sup>            | 35% (24-44) <sup>b</sup>                           | 50% (35-63) <sup>b</sup>                                                               |
| MSM                          | 3% (2-6)                            | 5% (3-9)                                           | 6% (3-11)                                                                              |
| Key populations <sup>a</sup> | 29% (17-42)                         | 54% (38-70)                                        | 63% (45-77)                                                                            |
| Non-key populations females  | 50% (42-59)                         | 25% (19-32)                                        | 39% (29-49)                                                                            |
| Non-key populations males    | 21% (15-27)                         | 21% (10-33)                                        | 25% (12-40)                                                                            |
| <b>Senegal</b>               |                                     |                                                    |                                                                                        |
| All females                  | 52% (43-60)                         | 22% (16-29)                                        | 38% (28-48)                                                                            |
| All males                    | 48% (40-57)                         | 78% (71-84)                                        | 89% (86-92)                                                                            |
| FSW                          | 7% (4-14)                           | 7% (3-14)                                          | 17% (8-31)                                                                             |
| Clients                      | 9% (5-15)                           | 27% (15-39)                                        | 36% (20-52)                                                                            |
| MSM                          | 25% (16-38)                         | 37% (23-54)                                        | 39% (24-58)                                                                            |
| Key populations <sup>a</sup> | 43% (32-55)                         | 72% (61-84)                                        | 79% (69-89)                                                                            |
| Non-key populations females  | 44% (35-52)                         | 15% (9-19)                                         | 22% (13-30)                                                                            |
| Non-key populations males    | 13% (8-17)                          | 13% (6-21)                                         | 15% (7-24)                                                                             |

<sup>a</sup> Includes FSW, their clients, and MSM

<sup>b</sup> Estimate which should be interpreted with caution due to the absence of specific survey among clients of FSW in Mali allowing to measure the size of this population, the prevalence of HIV or the levels of diagnosis/treatment (see discussion).

FSW: female sex workers; Clients: clients of FSW; MSM: men who have sex with men

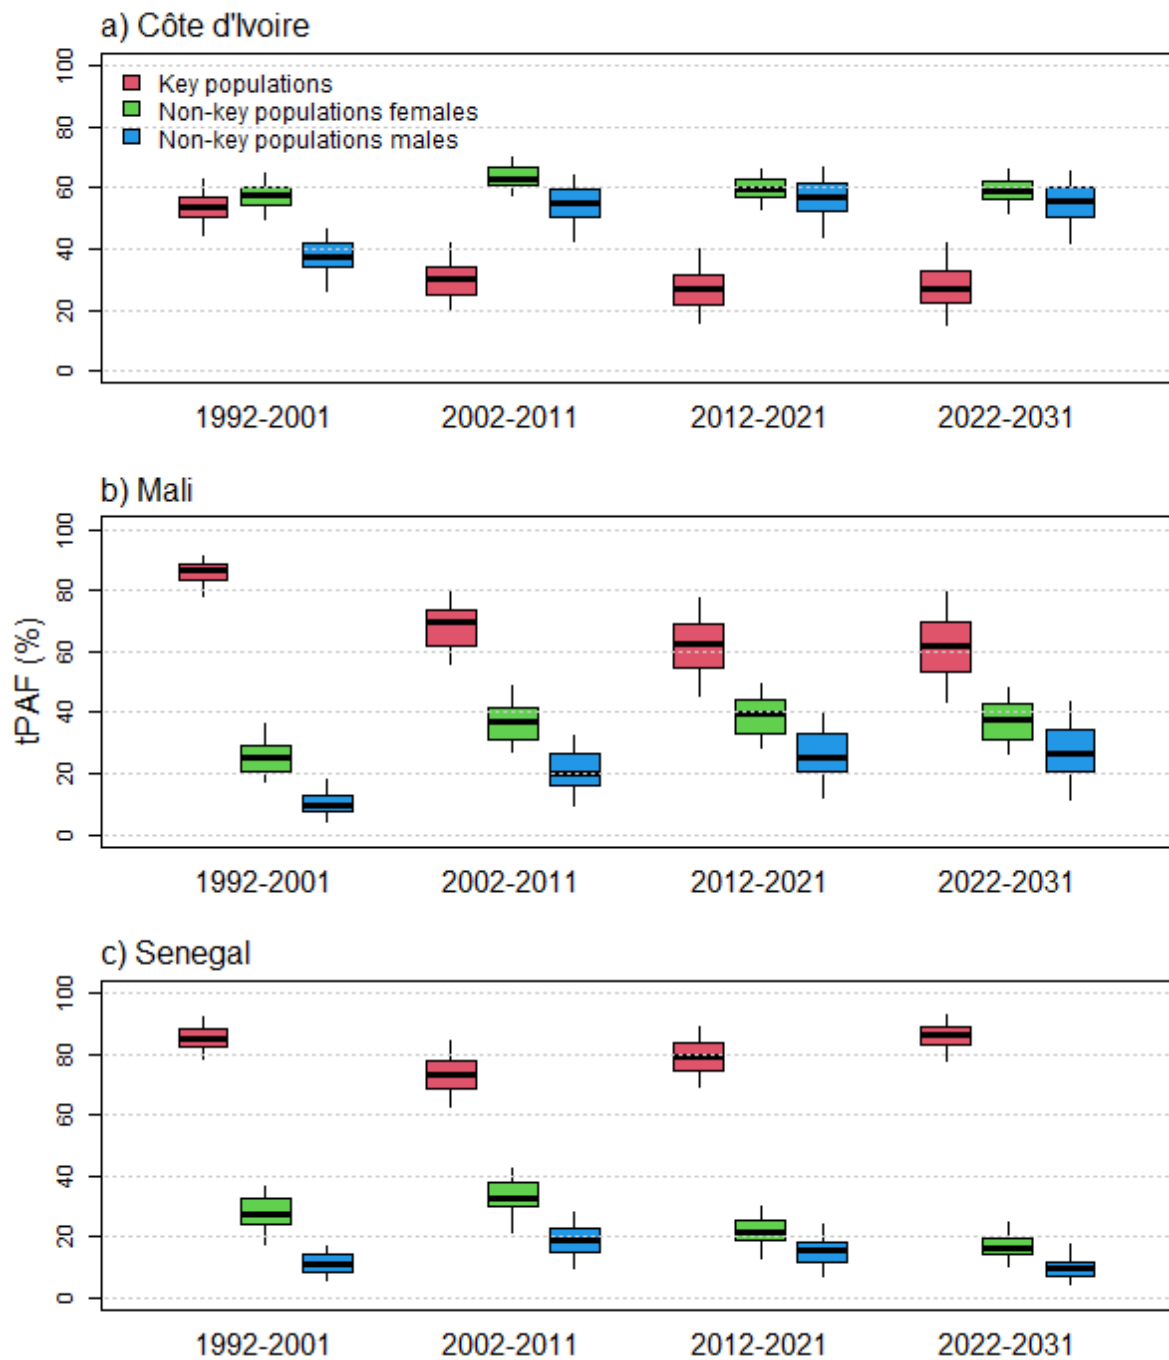

Figure S6: Changes in transmission PAF (tPAF) of key populations (female sex workers, their clients, and men who have sex with men, red boxes and intervals), non-key population females (green boxes and intervals), and non-key population males (blue boxes and intervals) over successive decades. Boxes represent median and interquartile range, whereas error bars represent 90% uncertainty interval (UI) (5<sup>th</sup> and 95<sup>th</sup> percentiles) of tPAF estimates across all posterior parameter sets.

Table S4a: Fraction of new HIV infections in Côte d'Ivoire over 2012-2021 acquired by all or specific groups (columns) which were directly and indirectly transmitted by specific groups (rows), commonly referred to as the transmission population attributable fraction (tPAFs). This can be interpreted as the fractions of new infections acquired in a population group (column) that would be averted by a 100% effective intervention blocking all transmission from another population (row)<sup>a</sup>. The sum of tPAF estimates from separate risk groups (columns) may exceed 100% as it accounts for onward secondary transmissions that may overlap for different groups[2]; as one can acquire HIV from more than one population group.

|                                                      | All            | All females    | All males      | Key Populations (including FSW clients) <sup>b</sup> | Non-Key Populations | Non-Key Populations females | Non-Key Populations males | Female sex workers | Clients of female sex workers | All men who have sex with men | Men who have sex with men and women | Men who have sex with men exclusively |
|------------------------------------------------------|----------------|----------------|----------------|------------------------------------------------------|---------------------|-----------------------------|---------------------------|--------------------|-------------------------------|-------------------------------|-------------------------------------|---------------------------------------|
| All females and males                                | 100%           | 100%           | 100%           | 100%                                                 | 100%                | 100%                        | 100%                      | 100%               | 100%                          | 100%                          | 100%                                | 100%                                  |
| All females                                          | 65%<br>(61-70) | 43%<br>(39-47) | 95%<br>(91-97) | 74%<br>(62-80)                                       | 64%<br>(60-69)      | 43%<br>(39-47)              | 100%                      | 48%<br>(43-53)     | 100%                          | 7%<br>(3-15)                  | 11%<br>(6-20)                       | 2%<br>(1-5)                           |
| All males                                            | 78%<br>(74-82) | 100%           | 49%<br>(45-53) | 68%<br>(61-75)                                       | 80%<br>(76-83)      | 100%                        | 45%<br>(41-50)            | 100%               | 48%<br>(43-54)                | 97%<br>(94-99)                | 95%<br>(91-97)                      | 100%                                  |
| Key Populations (including FSW clients) <sup>b</sup> | 27%<br>(16-40) | 28%<br>(16-45) | 24%<br>(16-36) | 68%<br>(53-81)                                       | 18%<br>(11-34)      | 22%<br>(13-42)              | 11%<br>(7-19)             | 100%               | 48%<br>(31-68)                | 95%<br>(89-98)                | 92%<br>(85-95)                      | 100%                                  |
| Non-Key Populations                                  | 84%<br>(73-90) | 81%<br>(69-90) | 88%<br>(80-93) | 48%<br>(31-65)                                       | 90%<br>(82-95)      | 85%<br>(73-92)              | 100%                      | 28%<br>(17-40)     | 66%<br>(44-84)                | 7%<br>(3-15)                  | 11%<br>(6-20)                       | 2%<br>(1-5)                           |
| Non-Key Populations females                          | 59%<br>(53-66) | 39%<br>(33-46) | 88%<br>(79-93) | 46%<br>(30-64)                                       | 61%<br>(56-68)      | 40%<br>(34-46)              | 100%                      | 27%<br>(16-40)     | 64%<br>(41-83)                | 7%<br>(3-15)                  | 11%<br>(6-20)                       | 2%<br>(1-5)                           |
| Non-Key Populations males                            | 57%<br>(44-67) | 77%<br>(61-87) | 31%<br>(22-40) | 17%<br>(11-26)                                       | 64%<br>(52-72)      | 82%<br>(65-90)              | 35%<br>(27-43)            | 9%<br>(5-15)       | 24%<br>(15-35)                | 2%<br>(1-6)                   | 3%<br>(2-8)                         | 1%<br>(0-1)                           |
| Female sex workers                                   | 7%<br>(3-13)   | 5%<br>(2-9)    | 10%<br>(4-20)  | 30%<br>(16-46)                                       | 3%<br>(1-5)         | 3%<br>(1-7)                 | 2%<br>(1-3)               | 21%<br>(11-31)     | 42%<br>(22-64)                | 0%<br>(0-0)                   | 0%<br>(0-0)                         | 0%<br>(0-0)                           |



|                                       |                |                |               |                |               |                |               |             |                |                |                |                |
|---------------------------------------|----------------|----------------|---------------|----------------|---------------|----------------|---------------|-------------|----------------|----------------|----------------|----------------|
| Clients of female sex workers         | 20%<br>(12-35) | 25%<br>(14-44) | 13%<br>(7-22) | 36%<br>(24-50) | 17%<br>(9-33) | 20%<br>(11-41) | 10%<br>(6-19) | 100%        | 24%<br>(14-38) | 1%<br>(0-2)    | 1%<br>(1-3)    | 0%<br>(0-0)    |
| All men who have sex with men         | 3%<br>(2-6)    | 2%<br>(1-3)    | 5%<br>(3-10)  | 15%<br>(9-29)  | 2%<br>(1-3)   | 2%<br>(1-3)    | 1%<br>(0-2)   | 0%<br>(0-0) | 1%<br>(0-1)    | 94%<br>(89-97) | 91%<br>(83-95) | 100%           |
| Men who have sex with men and women   | 2%<br>(1-5)    | 2%<br>(1-3)    | 3%<br>(2-6)   | 9%<br>(5-15)   | 2%<br>(1-3)   | 2%<br>(1-3)    | 1%<br>(0-2)   | 0%<br>(0-0) | 1%<br>(0-1)    | 52%<br>(37-71) | 50%<br>(34-69) | 56%<br>(38-77) |
| Men who have sex with men exclusively | 1%<br>(1-3)    | 0%<br>(0-1)    | 3%<br>(1-7)   | 9%<br>(4-21)   | 0%<br>(0-1)   | 0%<br>(0-1)    | 0%<br>(0-0)   | 0%<br>(0-0) | 0%<br>(0-0)    | 59%<br>(35-75) | 56%<br>(34-72) | 62%<br>(39-77) |

<sup>a</sup> As an example, 11% (6-20) of all new HIV infections among men who have sex with men and women over 2012-2021 could be averted by blocking all transmissions from all females, whereas 2% (1-3) of all new HIV infections among all females over 2012-2021 could be averted by blocking all transmissions from men who have sex with men and women.

<sup>b</sup> Key populations combine female sex workers, their clients, and men who have sex with men.

Table S4b: Fraction of new HIV infections in Mali over 2012-2021 acquired by all or specific groups (columns) which were directly and indirectly transmitted by specific groups (rows), commonly referred to as the transmission population attributable fraction (tPAFs). This can be interpreted as the fractions of new infections acquired in a population group (column) that would be averted by a 100% effective intervention blocking all transmission from another population (row)<sup>a</sup>. The sum of tPAF estimates from separate risk groups (columns) may exceed 100% as it accounts for onward secondary transmissions that may overlap for different groups[2]; as one can acquire HIV from more than one population group.

|                                                      | All            | All females    | All males      | Key Populations (including FSW clients) <sup>b</sup> | Non-Key Populations | Non-Key Populations females | Non-Key Populations males | Female sex workers | Clients of female sex workers | All men who have sex with men | Men who have sex with men and women | Men who have sex with men exclusively |
|------------------------------------------------------|----------------|----------------|----------------|------------------------------------------------------|---------------------|-----------------------------|---------------------------|--------------------|-------------------------------|-------------------------------|-------------------------------------|---------------------------------------|
| All females and males                                | 100%           | 100%           | 100%           | 100%                                                 | 100%                | 100%                        | 100%                      | 100%               | 100%                          | 100%                          | 100%                                | 100%                                  |
| All females                                          | 61%<br>(56-67) | 39%<br>(33-45) | 92%<br>(87-96) | 71%<br>(60-80)                                       | 57%<br>(51-62)      | 39%<br>(33-44)              | 100%                      | 42%<br>(35-48)     | 100%                          | 2%<br>(1-4)                   | 3%<br>(1-5)                         | 1%<br>(0-2)                           |
| All males                                            | 79%<br>(75-83) | 100%           | 49%<br>(43-57) | 72%<br>(65-78)                                       | 82%<br>(77-87)      | 100%                        | 40%<br>(32-48)            | 100%               | 50%<br>(43-59)                | 99%<br>(98-100)               | 99%<br>(98-99)                      | 100%                                  |
| Key Populations (including FSW clients) <sup>b</sup> | 63%<br>(45-77) | 69%<br>(48-83) | 56%<br>(38-71) | 91%<br>(79-96)                                       | 50%<br>(34-66)      | 62%<br>(42-78)              | 25%<br>(18-35)            | 100%               | 83%<br>(69-93)                | 99%<br>(98-100)               | 98%<br>(97-99)                      | 100%                                  |
| Non-Key Populations                                  | 51%<br>(35-66) | 43%<br>(25-59) | 63%<br>(45-80) | 18%<br>(7-37)                                        | 64%<br>(49-77)      | 48%<br>(31-66)              | 100%                      | 8%<br>(3-18)       | 26%<br>(12-49)                | 2%<br>(1-4)                   | 3%<br>(1-5)                         | 1%<br>(0-2)                           |
| Non-Key Populations females                          | 39%<br>(29-49) | 22%<br>(14-31) | 62%<br>(44-80) | 17%<br>(7-36)                                        | 47%<br>(38-55)      | 24%<br>(17-33)              | 100%                      | 8%<br>(3-18)       | 25%<br>(11-49)                | 2%<br>(1-4)                   | 3%<br>(1-5)                         | 1%<br>(0-2)                           |
| Non-Key Populations males                            | 25%<br>(12-40) | 36%<br>(21-56) | 10%<br>(4-17)  | 3%<br>(1-7)                                          | 34%<br>(21-50)      | 43%<br>(25-63)              | 15%<br>(8-25)             | 1%<br>(0-3)        | 4%<br>(2-9)                   | 0%<br>(0-1)                   | 0%<br>(0-1)                         | 0%<br>(0-0)                           |
| Female sex workers                                   | 24%<br>(13-39) | 18%<br>(10-27) | 33%<br>(17-53) | 55%<br>(39-69)                                       | 12%<br>(7-20)       | 15%<br>(9-24)               | 6%<br>(3-9)               | 33%<br>(23-41)     | 78%<br>(57-91)                | 0%<br>(0-0)                   | 0%<br>(0-0)                         | 0%<br>(0-0)                           |

|                                       |                |                |                |                |                |                |                |             |                |                 |                |                |
|---------------------------------------|----------------|----------------|----------------|----------------|----------------|----------------|----------------|-------------|----------------|-----------------|----------------|----------------|
| Clients of female sex workers         | 50%<br>(35-63) | 64%<br>(44-80) | 31%<br>(21-41) | 57%<br>(46-66) | 46%<br>(30-64) | 56%<br>(37-74) | 23%<br>(16-33) | 100%        | 46%<br>(36-57) | 0%<br>(0-1)     | 1%<br>(0-1)    | 0%<br>(0-0)    |
| All men who have sex with men         | 6%<br>(3-11)   | 4%<br>(1-8)    | 9%<br>(5-15)   | 12%<br>(6-21)  | 3%<br>(1-8)    | 4%<br>(1-9)    | 1%<br>(1-4)    | 0%<br>(0-0) | 0%<br>(0-1)    | 99%<br>(97-100) | 98%<br>(96-99) | 100%           |
| Men who have sex with men and women   | 5%<br>(2-9)    | 4%<br>(1-8)    | 6%<br>(3-12)   | 8%<br>(3-16)   | 3%<br>(1-8)    | 4%<br>(1-9)    | 1%<br>(1-4)    | 0%<br>(0-0) | 0%<br>(0-1)    | 70%<br>(31-89)  | 70%<br>(31-89) | 71%<br>(31-91) |
| Men who have sex with men exclusively | 2%<br>(1-5)    | 1%<br>(0-1)    | 4%<br>(1-10)   | 6%<br>(2-13)   | 1%<br>(0-1)    | 1%<br>(0-1)    | 0%<br>(0-0)    | 0%<br>(0-0) | 0%<br>(0-0)    | 48%<br>(19-81)  | 47%<br>(19-80) | 48%<br>(20-82) |

<sup>a</sup> As an example, 3% (1-5) of all new HIV infections among men who have sex with men and women over 2012-2021 could be averted by blocking all transmissions from all females, whereas 4% (1-8) of all new HIV infections among all females over 2012-2021 could be averted by blocking all transmissions from men who have sex with men and women.

<sup>b</sup> Key populations combine female sex workers, their clients, and men who have sex with men.

Table S4c: Fraction of new HIV infections in Senegal over 2012-2021 acquired by all or specific groups (columns) which were directly and indirectly transmitted by specific groups (rows), commonly referred to as the transmission population attributable fraction (tPAFs). This can be interpreted as the fractions of new infections acquired in a population group (column) that would be averted by a 100% effective intervention blocking all transmission from another population (row)<sup>a</sup>. The sum of tPAF estimates from separate risk groups (columns) may exceed 100% as it accounts for onward secondary transmissions that may overlap for different groups[2]; as one can acquire HIV from more than one population group.

|                                                      | All            | All females    | All males      | Key Populations (including FSW clients) <sup>b</sup> | Non-Key Populations | Non-Key Populations females | Non-Key Populations males | Female sex workers | Clients of female sex workers | All men who have sex with men | Men who have sex with men and women | Men who have sex with men exclusively |
|------------------------------------------------------|----------------|----------------|----------------|------------------------------------------------------|---------------------|-----------------------------|---------------------------|--------------------|-------------------------------|-------------------------------|-------------------------------------|---------------------------------------|
| All females and males                                | 100%           | 100%           | 100%           | 100%                                                 | 100%                | 100%                        | 100%                      | 100%               | 100%                          | 100%                          | 100%                                | 100%                                  |
| All females                                          | 38%<br>(28-48) | 30%<br>(24-38) | 47%<br>(32-63) | 30%<br>(16-46)                                       | 44%<br>(36-52)      | 27%<br>(21-36)              | 100%                      | 43%<br>(36-49)     | 100%                          | 0%<br>(0-1)                   | 0%<br>(0-1)                         | 0%<br>(0-0)                           |
| All males                                            | 89%<br>(86-92) | 100%           | 77%<br>(69-85) | 90%<br>(85-94)                                       | 88%<br>(85-91)      | 100%                        | 47%<br>(41-53)            | 100%               | 54%<br>(44-62)                | 100%                          | 100%                                | 100%                                  |
| Key Populations (including FSW clients) <sup>b</sup> | 79%<br>(69-89) | 78%<br>(65-89) | 81%<br>(69-88) | 98%<br>(95-99)                                       | 66%<br>(53-78)      | 74%<br>(60-86)              | 36%<br>(29-43)            | 100%               | 89%<br>(76-96)                | 100%                          | 100%                                | 100%                                  |
| Non-Key Populations                                  | 30%<br>(17-44) | 29%<br>(16-41) | 30%<br>(19-44) | 5%<br>(2-11)                                         | 48%<br>(33-61)      | 33%<br>(19-47)              | 100%                      | 7%<br>(2-16)       | 19%<br>(8-41)                 | 0%<br>(0-1)                   | 0%<br>(0-1)                         | 0%<br>(0-0)                           |
| Non-Key Populations females                          | 22%<br>(13-30) | 14%<br>(7-20)  | 30%<br>(19-44) | 5%<br>(2-11)                                         | 35%<br>(25-42)      | 15%<br>(9-22)               | 100%                      | 7%<br>(2-16)       | 19%<br>(7-41)                 | 0%<br>(0-1)                   | 0%<br>(0-1)                         | 0%<br>(0-0)                           |
| Non-Key Populations males                            | 15%<br>(7-24)  | 26%<br>(13-39) | 4%<br>(1-8)    | 1%<br>(0-2)                                          | 26%<br>(15-38)      | 29%<br>(17-45)              | 12%<br>(7-19)             | 1%<br>(0-3)        | 3%<br>(1-8)                   | 0%<br>(0-0)                   | 0%<br>(0-0)                         | 0%<br>(0-0)                           |
| Female sex workers                                   | 17%<br>(8-31)  | 16%<br>(8-29)  | 18%<br>(8-34)  | 25%<br>(12-42)                                       | 11%<br>(5-21)       | 13%<br>(6-24)               | 6%<br>(3-11)              | 36%<br>(27-46)     | 84%<br>(65-94)                | 0%<br>(0-0)                   | 0%<br>(0-0)                         | 0%<br>(0-0)                           |

|                                       |                |                |                |                |                |                |                |             |                |                |                  |                |
|---------------------------------------|----------------|----------------|----------------|----------------|----------------|----------------|----------------|-------------|----------------|----------------|------------------|----------------|
| Clients of female sex workers         | 36%<br>(20-52) | 54%<br>(33-73) | 16%<br>(7-29)  | 28%<br>(14-51) | 40%<br>(24-60) | 45%<br>(27-66) | 24%<br>(14-34) | 100%        | 48%<br>(35-59) | 0%<br>(0-0)    | 0%<br>(0-0)      | 0%<br>(0-0)    |
| All men who have sex with men         | 39%<br>(24-58) | 25%<br>(10-40) | 57%<br>(40-73) | 60%<br>(38-79) | 25%<br>(10-40) | 29%<br>(12-45) | 11%<br>(5-21)  | 1%<br>(0-2) | 3%<br>(1-8)    | 100%           | 100%<br>(99-100) | 100%           |
| Men who have sex with men and women   | 31%<br>(17-47) | 25%<br>(10-40) | 39%<br>(25-56) | 40%<br>(23-62) | 25%<br>(10-40) | 29%<br>(12-45) | 11%<br>(5-21)  | 1%<br>(0-2) | 3%<br>(1-8)    | 69%<br>(46-86) | 70%<br>(48-86)   | 69%<br>(44-86) |
| Men who have sex with men exclusively | 19%<br>(11-32) | 8%<br>(4-14)   | 33%<br>(19-49) | 36%<br>(21-55) | 7%<br>(4-13)   | 9%<br>(5-15)   | 3%<br>(2-6)    | 0%<br>(0-1) | 1%<br>(0-2)    | 62%<br>(38-82) | 62%<br>(39-83)   | 61%<br>(37-80) |

<sup>a</sup> As an example, 0% (0-1) of all new HIV infections among men who have sex with men and women over 2012-2021 could be averted by blocking all transmissions from all females, whereas 25% (10-40) of all new HIV infections among all females over 2012-2021 could be averted by blocking all transmissions from men who have sex with men and women.

<sup>b</sup> Key populations combine female sex workers, their clients, and men who have sex with men.

## HIV diagnosis and treatment gaps, and transmission PAF of PLHIV with undiagnosed infection

Table S5. Estimated fraction of people living with HIV (PLHIV) with an undiagnosed infection in January 2022, fraction of PLHIV with a diagnosed but untreated infection in January 2022, fraction of PLHIV which are on ART, fraction of PLHIV with diagnosed infection which are on ART (UNAIDS 2<sup>nd</sup> “95%” target), distribution of PLHIV with an untreated infection in January 2022 in each country. Median and 90% UI (5<sup>th</sup> and 95<sup>th</sup> percentiles) of outcomes are shown.

|                      | Fractions of PLHIV with an undiagnosed infection (2022) | Fractions of PLHIV with a diagnosed infection but not on ART (2022) | Fractions of PLHIV on ART (2022) | Fractions of PLHIV diagnosed that are on ART (2022) | Distribution (%) of PLHIV not on ART by risk group (2022) |
|----------------------|---------------------------------------------------------|---------------------------------------------------------------------|----------------------------------|-----------------------------------------------------|-----------------------------------------------------------|
| <b>Côte d’Ivoire</b> |                                                         |                                                                     |                                  |                                                     |                                                           |
| All                  | 25% (22-28)                                             | 7% (6-11)                                                           | 67% (64-69)                      | 90% (86-92)                                         | 100% (100-100)                                            |
| All females          | 18% (15-21)                                             | 8% (6-12)                                                           | 73% (71-75)                      | 90% (86-92)                                         | 49% (44-56)                                               |
| All males            | 37% (32-41)                                             | 6% (5-9)                                                            | 56% (53-60)                      | 90% (86-92)                                         | 51% (44-56)                                               |
| FSW                  | 31% (22-39)                                             | 4% (2-10)                                                           | 64% (57-75)                      | 95% (86-98)                                         | 3% (1-4)                                                  |
| Clients              | 37% (32-42)                                             | 6% (5-9)                                                            | 56% (52-61)                      | 90% (86-92)                                         | 10% (6-17)                                                |
| MSM                  | 44% (37-57)                                             | 3% (1-7)                                                            | 52% (40-60)                      | 95% (87-98)                                         | 3% (2-6)                                                  |
| Key populations (KP) | 38% (33-42)                                             | 5% (4-8)                                                            | 57% (53-61)                      | 91% (87-94)                                         | 16% (12-23)                                               |
| Non-KP females       | 18% (14-21)                                             | 8% (6-12)                                                           | 73% (72-76)                      | 90% (85-92)                                         | 47% (41-53)                                               |
| Non-KP males         | 36% (32-41)                                             | 5% (3-8)                                                            | 56% (53-62)                      | 90% (86-92)                                         | 48% (39-56)                                               |
| <b>Mali</b>          |                                                         |                                                                     |                                  |                                                     |                                                           |
| All                  | 48% (43-51)                                             | 6% (4-8)                                                            | 46% (43-51)                      | 89% (84-92)                                         | 100% (100-100)                                            |
| All females          | 42% (38-44)                                             | 7% (5-9)                                                            | 52% (49-55)                      | 89% (84-92)                                         | 55% (48-63)                                               |
| All males            | 58% (50-63)                                             | 4% (3-7)                                                            | 38% (33-45)                      | 89% (85-93)                                         | 45% (37-52)                                               |
| FSW                  | 45% (33-60)                                             | 4% (2-13)                                                           | 49% (37-63)                      | 93% (78-97)                                         | 4% (2-7)                                                  |
| Clients              | 58% (49-64)                                             | 5% (3-7)                                                            | 38% (32-46)                      | 89% (85-93)                                         | 19% (11-32)                                               |
| MSM                  | 40% (30-51)                                             | 3% (1-12)                                                           | 56% (44-67)                      | 94% (80-98)                                         | 4% (2-6)                                                  |
| Key populations (KP) | 51% (46-58)                                             | 4% (3-8)                                                            | 44% (38-51)                      | 91% (84-94)                                         | 28% (16-41)                                               |
| Non-KP females       | 42% (37-44)                                             | 7% (5-9)                                                            | 52% (49-56)                      | 89% (84-92)                                         | 51% (43-59)                                               |
| Non-KP males         | 62% (54-68)                                             | 3% (2-6)                                                            | 34% (28-42)                      | 89% (84-92)                                         | 11% (7-16)                                                |

| <b>Senegal</b>       |             |             |             |             |                |
|----------------------|-------------|-------------|-------------|-------------|----------------|
| All                  | 22% (18-27) | 10% (7-14)  | 68% (63-71) | 87% (83-91) | 100% (100-100) |
| All females          | 11% (9-15)  | 10% (7-13)  | 79% (76-82) | 89% (85-92) | 39% (29-47)    |
| All males            | 38% (31-43) | 10% (7-16)  | 52% (47-58) | 83% (76-89) | 61% (53-71)    |
| FSW                  | 28% (18-41) | 21% (11-35) | 50% (41-59) | 71% (55-84) | 6% (3-10)      |
| Clients              | 23% (16-33) | 7% (5-10)   | 70% (61-77) | 91% (87-93) | 10% (5-17)     |
| MSM                  | 57% (41-71) | 13% (7-27)  | 28% (20-36) | 68% (50-81) | 37% (24-56)    |
| Key populations (KP) | 42% (34-51) | 12% (8-22)  | 45% (37-51) | 78% (66-86) | 54% (42-66)    |
| Non-KP females       | 10% (7-13)  | 9% (7-13)   | 81% (77-84) | 90% (86-93) | 32% (24-40)    |
| Non-KP males         | 24% (17-33) | 6% (4-9)    | 68% (60-76) | 90% (87-93) | 27% (19-41)    |

<sup>a</sup>Estimate which should be interpreted with caution due to the absence of specific survey among clients of FSW in Mali allowing to measure the size of this population, the prevalence of HIV or the levels of diagnosis/treatment.

FSW: female sex workers; clients: clients of FSW; MSM: men who have sex with men; Key populations: FSW, clients, and MSM combined

Table S6. Estimated fraction of people living with HIV (PLHIV) with an undiagnosed infection in January 2012, distribution of PLHIV with an undiagnosed infection in January 2012, and fraction of all new HIV infections which were directly and indirectly transmitted (tPAF) by specific risk groups of PLHIV with an undiagnosed HIV infection over 2012-2021 in Cote d'Ivoire, Mali, and Senegal. Median and 90%UI (5<sup>th</sup> and 95<sup>th</sup> percentiles) of outcomes are shown.

|                      | <b>Fractions of PLHIV with an undiagnosed infection (2012)</b> | <b>Distribution (%) of PLHIV with undiagnosed infections by risk group (2012)<sup>a</sup></b> | <b>Transmission PAF of PLHIV with undiagnosed infection (2012-2021)</b> |
|----------------------|----------------------------------------------------------------|-----------------------------------------------------------------------------------------------|-------------------------------------------------------------------------|
| <b>Côte d'Ivoire</b> |                                                                |                                                                                               |                                                                         |
| All                  | 53% (49-59)                                                    | 100% (100-100)                                                                                | 74% (68-82)                                                             |
| All females          | 48% (42-53)                                                    | 51% (46-58)                                                                                   | 41% (36-47)                                                             |
| All males            | 61% (55-67)                                                    | 49% (42-54)                                                                                   | 59% (52-67)                                                             |
| FSW                  | 59% (51-66)                                                    | 3% (2-4)                                                                                      | 5% (2-10)                                                               |
| Clients              | 58% (51-64)                                                    | 9% (6-15)                                                                                     | 15% (9-26)                                                              |
| MSM                  | 71% (60-79)                                                    | 4% (2-7)                                                                                      | 3% (2-5)                                                                |
| Key populations (KP) | 61% (55-67)                                                    | 15% (12-22)                                                                                   | 20% (12-31)                                                             |
| Non-KP females       | 47% (42-53)                                                    | 49% (43-56)                                                                                   | 37% (30-44)                                                             |
| Non-KP males         | 62% (55-68)                                                    | 35% (30-41)                                                                                   | 43% (31-53)                                                             |
| <b>Mali</b>          |                                                                |                                                                                               |                                                                         |
| All                  | 68% (64-71)                                                    | 100% (100-100)                                                                                | 82% (78-87)                                                             |
| All females          | 66% (63-70)                                                    | 58% (50-65)                                                                                   | 47% (42-54)                                                             |
| All males            | 70% (64-75)                                                    | 42% (35-50)                                                                                   | 67% (60-71)                                                             |
| FSW                  | 55% (41-63)                                                    | 4% (2-7)                                                                                      | 18% (9-33)                                                              |
| Clients              | 69% (62-76) <sup>b</sup>                                       | 20% (12-31)                                                                                   | 42% (28-54)                                                             |
| MSM                  | 47% (40-60)                                                    | 3% (2-4)                                                                                      | 4% (2-8)                                                                |
| Key populations (KP) | 63% (58-69)                                                    | 28% (16-39)                                                                                   | 51% (34-63)                                                             |
| Non-KP females       | 67% (64-71)                                                    | 53% (46-61)                                                                                   | 30% (21-39)                                                             |
| Non-KP males         | 76% (70-81)                                                    | 19% (14-26)                                                                                   | 22% (11-34)                                                             |
| <b>Senegal</b>       |                                                                |                                                                                               |                                                                         |
| All                  | 37% (33-43)                                                    | 100% (100-100)                                                                                | 72% (66-77)                                                             |
| All females          | 28% (23-36)                                                    | 45% (37-53)                                                                                   | 21% (15-29)                                                             |
| All males            | 50% (44-59)                                                    | 55% (47-63)                                                                                   | 65% (59-70)                                                             |
| FSW                  | 47% (36-58)                                                    | 7% (4-11)                                                                                     | 10% (5-18)                                                              |
| Clients              | 43% (33-55)                                                    | 16% (9-24)                                                                                    | 23% (12-36)                                                             |
| MSM                  | 65% (51-77)                                                    | 18% (9-33)                                                                                    | 32% (19-49)                                                             |
| Key populations (KP) | 52% (46-59)                                                    | 41% (30-54)                                                                                   | 59% (49-68)                                                             |
| Non-KP females       | 26% (21-35)                                                    | 39% (30-47)                                                                                   | 11% (6-17)                                                              |
| Non-KP males         | 45% (36-58)                                                    | 20% (13-28)                                                                                   | 10% (5-19)                                                              |

<sup>a</sup> Takes into account the size of the risk population as well as the proportion of PLHIV in the relevant subgroup with undiagnosed infection.

<sup>b</sup> Estimates for Mali should be interpreted with caution due to the absence of specific survey among clients of FSW in Mali allowing to measure the size of this population, the prevalence of HIV or the levels of diagnosis/treatment (see discussion).



FSW: female sex workers; clients: clients of FSW; MSM: men who have sex with men; Key populations: FSW, clients, and MSM combined

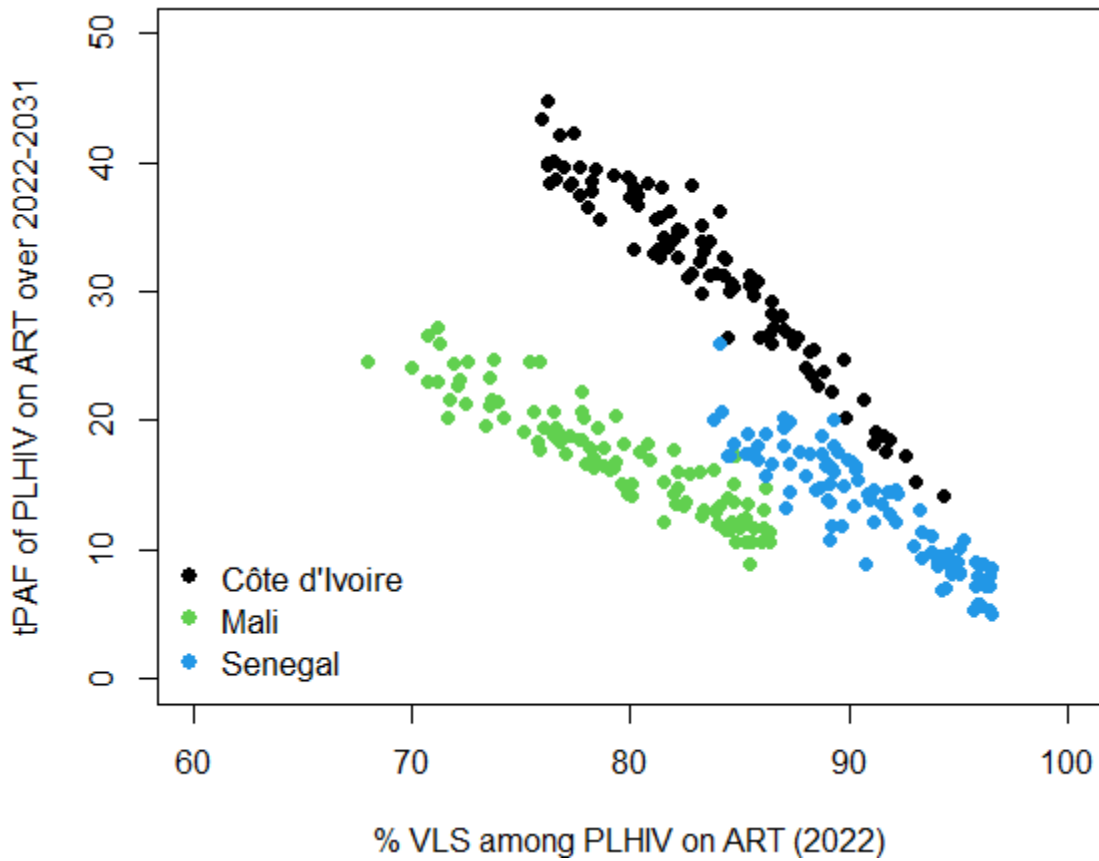

Figure S7: Fractions of new HIV infections (directly or indirectly) transmitted by PLHIV on ART in Côte d'Ivoire (black dots), Mali (green dots), and Senegal (blue dots) over 2022-2031, as a function of the average fraction of people living with HIV (PLHIV) on ART which have a suppressed viral load (VLS) in 2022. Each point represents the estimate from one single fitted simulation. The fraction of PLHIV with a suppressed viral load is a parameter informed by UNAIDS estimates assumed not to depend on the coverage of ART, and varies across simulations.

## References

1. Ministère de la Santé et de l'Hygiène Publique (MSHP). **Côte d'Ivoire Population-Based HIV Impact Assessment (CIPHIA) 2017-2018: Final Report**. Abidjan: MSHP; 2021. Available from: [https://phia.icap.columbia.edu/wp-content/uploads/2021/05/CIPHIA-Final-Report\\_En.pdf](https://phia.icap.columbia.edu/wp-content/uploads/2021/05/CIPHIA-Final-Report_En.pdf).
2. Mishra S, Silhol R, Knight J, Phaswana-Mafuya R, Diouf D, Wang L, et al. **Estimating the epidemic consequences of HIV prevention gaps among key populations**. *J Int AIDS Soc* 2021; 24 Suppl 3:e25739.
